# Supplementary material for: Evaluation of polyketones with N-cyclic structure as electrode material for electrochemical energy storage: case of tetraketopiperazine unit
Source: Royal Society of Chemistry journal article supplement (doi:10.1039/c0ee00126k), 2010-01-01

## Electronic Supplementary Information

### Evaluation of polyketones with N-cyclic structure as electrode material for electrochemical energy storage: case of tetraketopiperazine unit

Joaquin Geng,<sup>a</sup> Jean-Pierre Bonnet,<sup>a</sup> Stéven Renault,<sup>a</sup> Franck Dolhem,<sup>b</sup> Philippe Poizot<sup>a,\*</sup>

*a. Laboratoire de Réactivité et Chimie des Solides, UMR CNRS 6007, Université de Picardie Jules Verne, 33 rue Saint-Leu, 80039 Amiens Cedex, France.*

*b. Laboratoire des Glucides, UMR CNRS 6219, Université de Picardie Jules Verne, 33 rue Saint-Leu, 80039 Amiens Cedex, France.*

#### General Methods:

<sup>1</sup>H and <sup>13</sup>C NMR spectra were recorded at 300 MHz and 75 MHz respectively, on a BRUKER DMX 300, at room temperature. Chemical shifts ( $\delta$ ) were expressed in part per million (ppm) relative to residual solvent.

Infrared spectra were performed with a SHIMADZU 8400S FTIR spectrophotometer in the 400–4000 cm<sup>-1</sup> frequency range equipped with an attenuated total reflectance probe (ATR). ESI-HRMS experiments were performed in the positive ion mode on a Q-TOF Ultima Global instrument (Waters-Micromass, Manchester, UK) equipped with a pneumatically assisted electrospray ion source (Z-spray) and an additional sprayer for the reference compound (LockSpray). The prepared solutions were directly introduced (5  $\mu$ L/min) via an integrated syringe pump in the electrospray source. The source and desolvation temperatures were kept at 80 and 150 °C, respectively. Nitrogen was used as a drying and nebulizing gas at flow rates of 350 and 50 L/h, respectively. Calibration of the instrument was performed using the ions produced by a phosphoric acid solution (0.2% in H<sub>2</sub>O/CH<sub>3</sub>CN 50/50<sup>vol/vol</sup>). The mass range was 50–1000 Da and spectra were recorded at 1 s per scan in the profile mode at a resolution of 10,000 full width at half-maximum (FWHM).

#### NMR Spectra:

<sup>1</sup>H and <sup>13</sup>C NMR spectra of 2,3,5,6-tetraketopiperazine derivatives PHP, AP, PRP and <sup>1</sup>H NMR spectrum of o-AP are presented herein.

PHP:  $^1\text{H}$  (300 MHz, DMSO- $d_6$ )

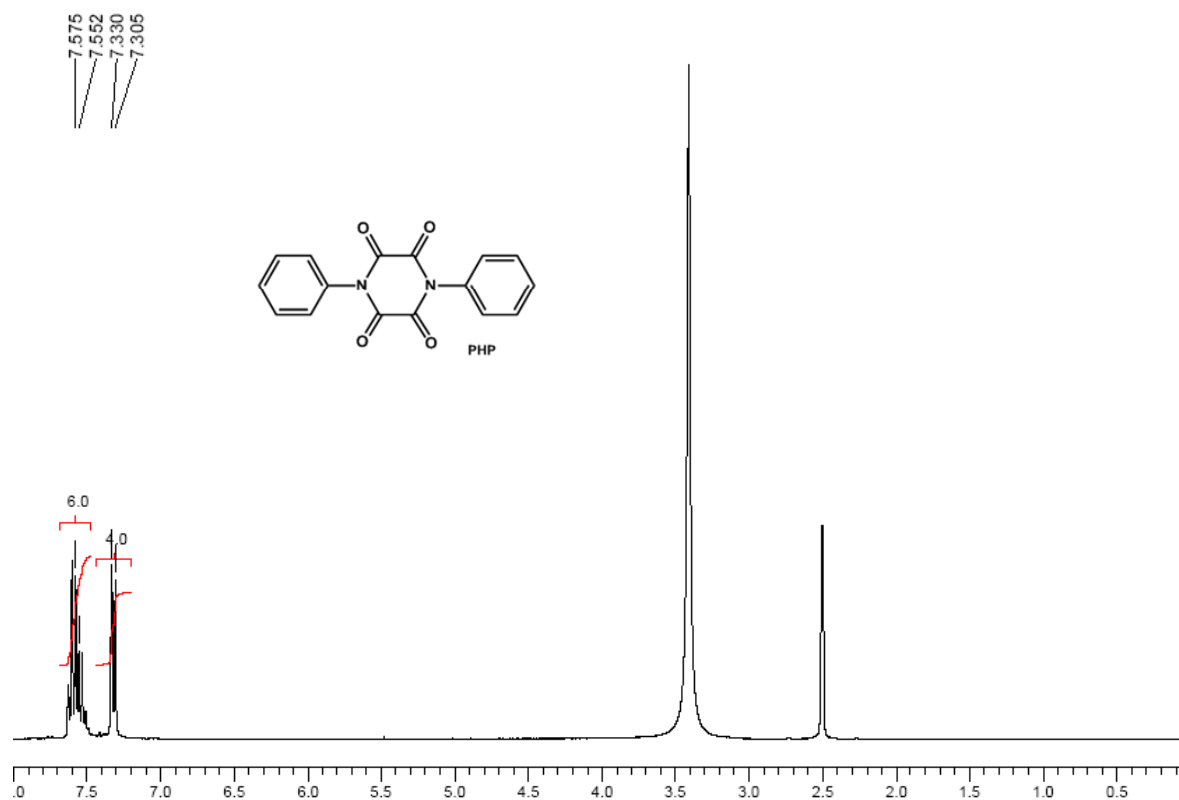

PHP:  $^{13}\text{C}$  (75 MHz, DMSO- $d_6$ )

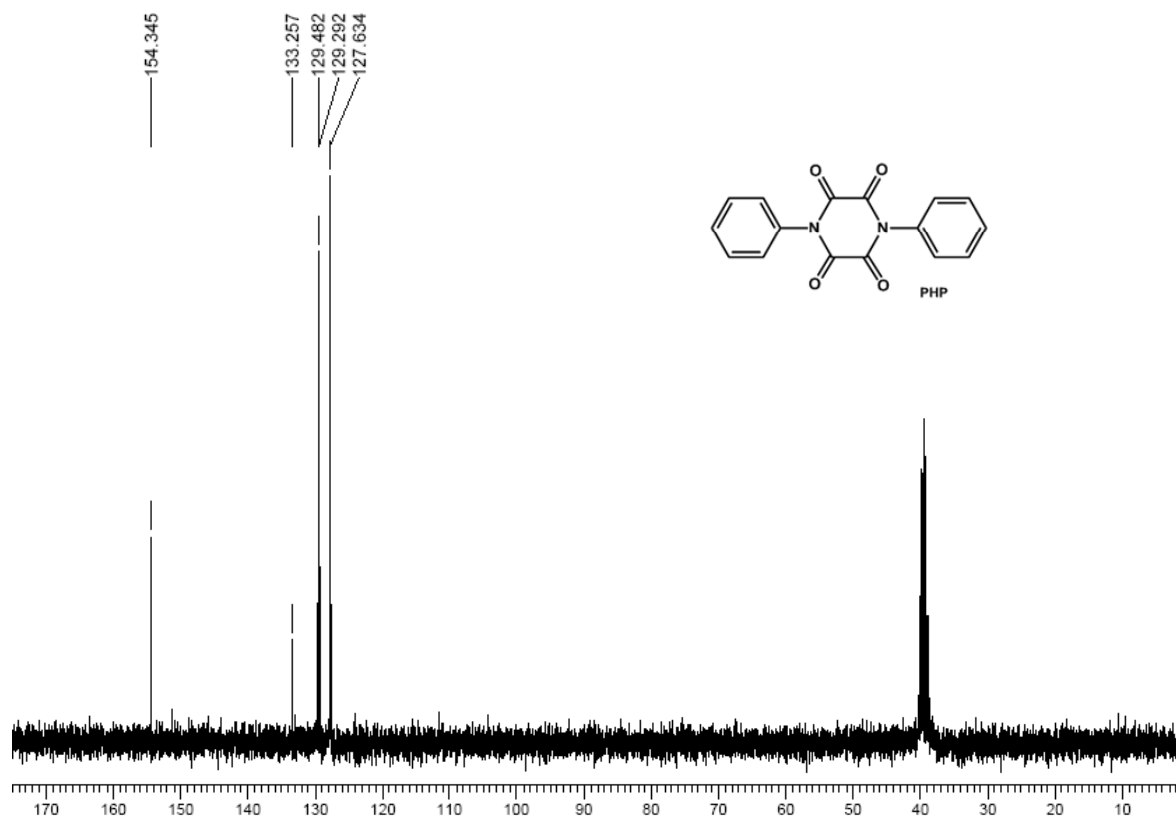

AP and o-AP:  $^1\text{H}$  (300 MHz,  $\text{DMSO-d}_6$ )

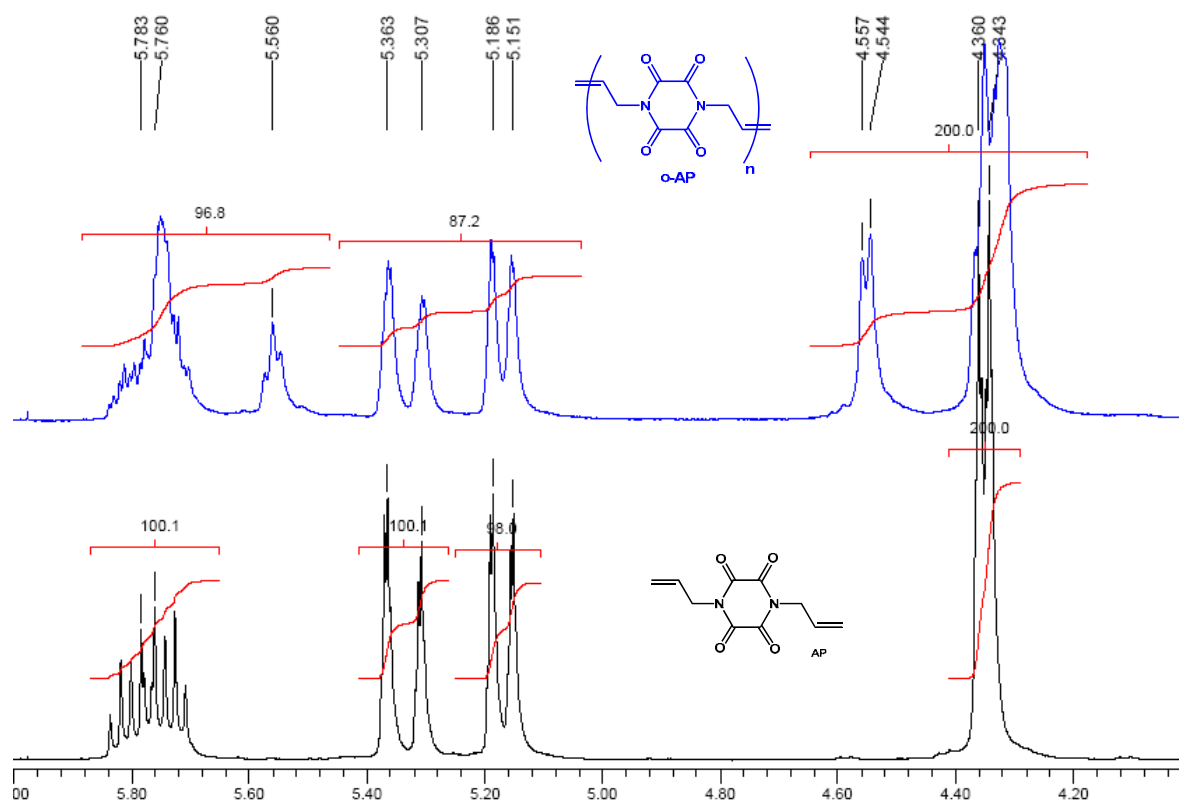

AP:  $^{13}\text{C}$  (75 MHz,  $\text{DMSO-d}_6$ )

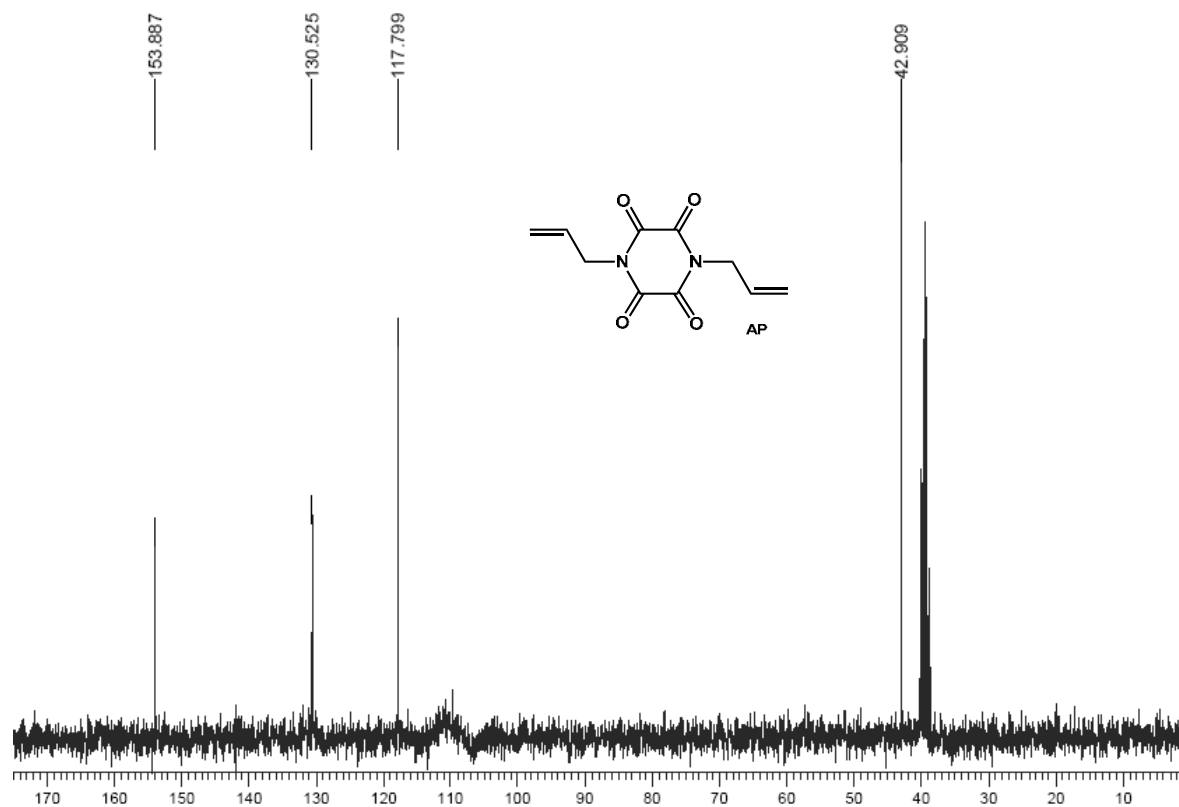

PRP:  $^1\text{H}$  (300 MHz, DMSO- $d_6$ )

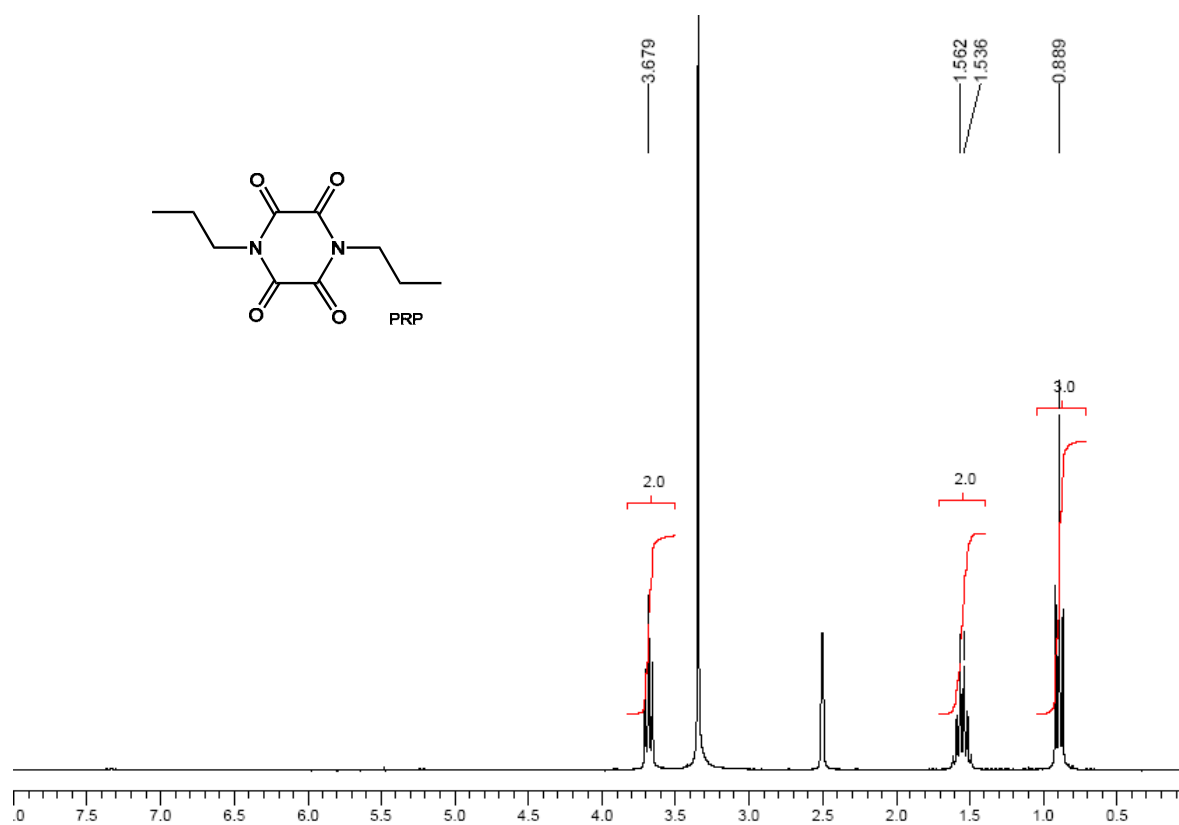

PRP:  $^{13}\text{C}$  (75 MHz, DMSO- $d_6$ )

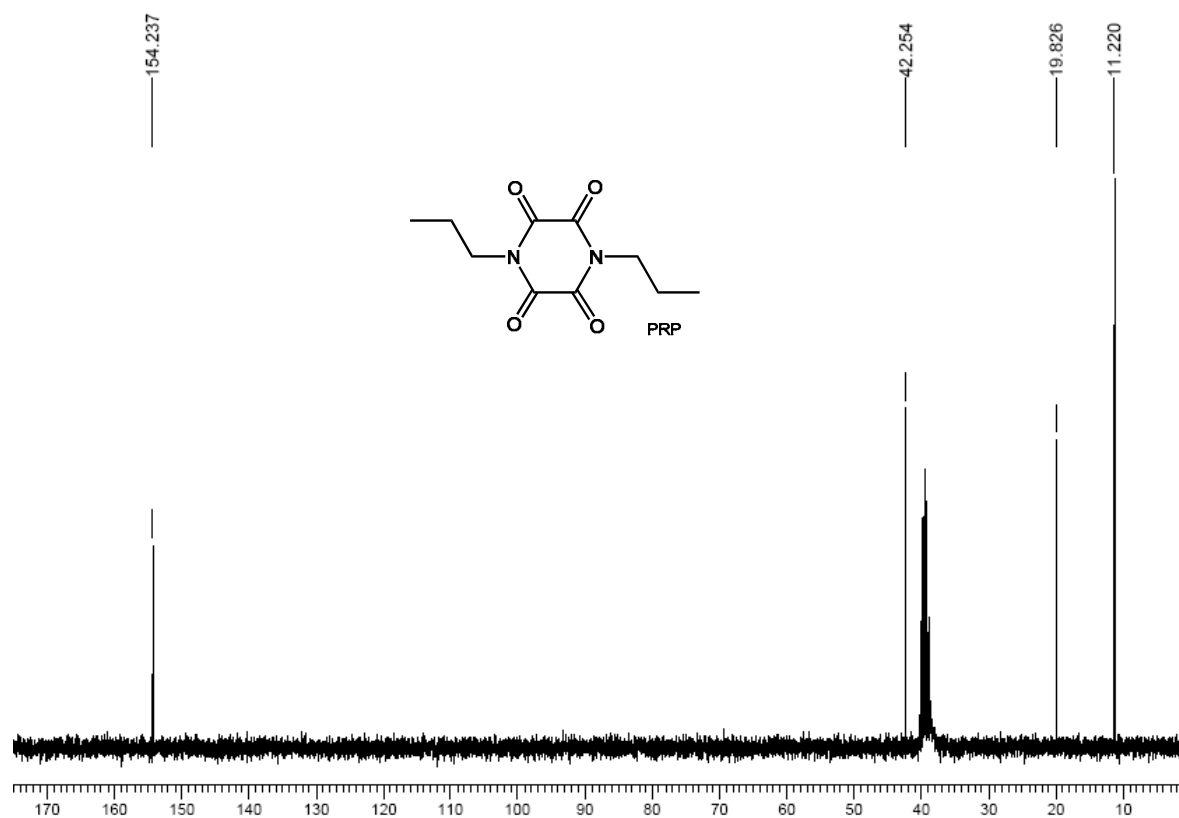

Supplement: c0ee00126k.pdf [file c0ee00126k.pdf]
